# Supplementary material for: Using the Ecosystem Services Concept to Assess Transformation of Agricultural Landscapes in the European Alps
Source: MDPI journal article supplement (doi:10.3390/land11010049), 2021-12-30
Supplement: s1 [file s1]

## Supplementary Material

**Table S1:** Indicators selected for cluster analysis (adapted from [1]).

| Indicator                                                            | Pillar of sustainability |
|----------------------------------------------------------------------|--------------------------|
| Road Distance to Nearest Motorway or Major Road                      | economy, society         |
| Road Distance to Nearest Commercial Airport                          | economy, society         |
| Average Annual Net Migration Balance                                 | society                  |
| Old Age Dependency Ratio                                             | society                  |
| Older People Living in Single-person Households                      | society                  |
| General Fertility Rate                                               | society                  |
| Employment Rate of Older People                                      | economy                  |
| Female Employment Rate                                               | economy                  |
| Change in Female Employment Rate                                     | economy                  |
| Tertiary Sector Employment                                           | economy                  |
| Commuter Balance                                                     | economy                  |
| Road Distance to Nearest Hospital                                    | economy, society         |
| Tourist Beds per Resident                                            | economy                  |
| Change in Number of Farms                                            | economy                  |
| Change in Used Agricultural Area                                     | economy, environment     |
| Patch Density of Agricultural Areas                                  | economy, environment     |
| Non-grassland Areas in Agricultural Use                              | environment              |
| Artificial Areas                                                     | environment              |
| Land-cover Diversity of Agricultural, Near-natural and Natural Areas | environment              |
| Effective Mesh Size of Agricultural, Near-natural and Natural Areas  | environment              |

**Table S2:** LULC types aggregated from CLC classes [2] (adapted from [3]).

| LULC type              | CLC classes                                           |
|------------------------|-------------------------------------------------------|
| Settlement area        | 111, 112, 121, 122, 123, 124, 131, 132, 133, 141, 142 |
| Crop cultivation       | 211, 212, 213, 241                                    |
| Permanent culture      | 221, 222, 223                                         |
| Fertilised grassland   | 231, 242, 243, 244                                    |
| Unfertilised grassland | 321                                                   |
| Forest                 | 311, 312, 313, 324                                    |
| Abandoned land         | 322, 323, 331, 332, 333, 334, 335                     |
| Wetlands               | 411, 412                                              |
| Rivers                 | 511                                                   |
| Lakes                  | 512                                                   |

**Table S3:** ES values (ES supply weighted with socio-cultural preferences) for different LULC types (adapted from [3]).

| ES                                              | Settlement area   | Crop cultivation  | Permanent culture | Fertilised grassland | Unfertilised grassland | Forest            | Abandoned land    | Wetlands          | Rivers            | Lakes             | Socio-cultural preference |
|-------------------------------------------------|-------------------|-------------------|-------------------|----------------------|------------------------|-------------------|-------------------|-------------------|-------------------|-------------------|---------------------------|
| Pasture and fodder production (P1)              | 0.00 <sup>a</sup> | 0.86 <sup>h</sup> | 0.85 <sup>h</sup> | 4.04 <sup>h</sup>    | 2.23 <sup>h</sup>      | 0.77 <sup>h</sup> | 1.06 <sup>h</sup> | 0.77 <sup>a</sup> | 0.00 <sup>a</sup> | 0.00 <sup>a</sup> | 4.15 <sup>h</sup>         |
| Agricultural food production (P2)               | 0.00 <sup>a</sup> | 2.06 <sup>h</sup> | 2.86 <sup>h</sup> | 0.00 <sup>h</sup>    | 0.00 <sup>h</sup>      | 0.00 <sup>h</sup> | 0.00 <sup>h</sup> | 0.00 <sup>a</sup> | 0.00 <sup>a</sup> | 0.00 <sup>a</sup> | 4.29 <sup>h</sup>         |
| Timber production (P3)                          | 0.00 <sup>a</sup> | 0.00 <sup>h</sup> | 2.18 <sup>h</sup> | 0.02 <sup>h</sup>    | 0.67 <sup>h</sup>      | 4.53 <sup>h</sup> | 1.66 <sup>h</sup> | 1.66 <sup>a</sup> | 1.66 <sup>a</sup> | 0.00 <sup>a</sup> | 4.18 <sup>h</sup>         |
| Gathering mushrooms and wild berries (P4)       | 0.00 <sup>a</sup> | 0.10 <sup>h</sup> | 0.17 <sup>h</sup> | 0.45 <sup>h</sup>    | 0.97 <sup>h</sup>      | 4.18 <sup>h</sup> | 1.77 <sup>h</sup> | 1.77 <sup>a</sup> | 0.00 <sup>a</sup> | 0.00 <sup>a</sup> | 4.19 <sup>h</sup>         |
| Provision of clean drinking water (P5)          | 0.29 <sup>b</sup> | 1.19 <sup>h</sup> | 1.81 <sup>h</sup> | 2.39 <sup>h</sup>    | 3.91 <sup>h</sup>      | 4.09 <sup>h</sup> | 4.43 <sup>h</sup> | 3.95 <sup>b</sup> | 4.03 <sup>b</sup> | 4.03 <sup>b</sup> | 4.52 <sup>h</sup>         |
| Protection from hazards (R1a), slope <30°       | 0.00 <sup>a</sup> | 0.30 <sup>a</sup> | 0.69 <sup>a</sup> | 0.73 <sup>a</sup>    | 0.79 <sup>a</sup>      | 0.94 <sup>a</sup> | 0.54 <sup>a</sup> | 0.54 <sup>i</sup> | 2.50 <sup>i</sup> | 3.00 <sup>i</sup> | 1.00 <sup>h</sup>         |
| Protection from hazards (R1b), slope >30°       | 0.00 <sup>a</sup> | 1.27 <sup>h</sup> | 2.93 <sup>h</sup> | 3.13 <sup>h</sup>    | 3.38 <sup>h</sup>      | 4.00 <sup>h</sup> | 2.30 <sup>h</sup> | 1.90 <sup>i</sup> | 2.50 <sup>i</sup> | 3.00 <sup>i</sup> | 4.27 <sup>h</sup>         |
| Prevention of water scarcity (R2)               | 3.03 <sup>c</sup> | 2.40 <sup>h</sup> | 2.46 <sup>h</sup> | 4.09 <sup>h</sup>    | 4.34 <sup>h</sup>      | 3.72 <sup>h</sup> | 4.34 <sup>h</sup> | 1.56 <sup>c</sup> | 3.90 <sup>c</sup> | 3.90 <sup>c</sup> | 4.45 <sup>h</sup>         |
| Provision of habitats (R3)                      | 2.63 <sup>d</sup> | 1.77 <sup>h</sup> | 1.97 <sup>h</sup> | 2.20 <sup>h</sup>    | 3.71 <sup>h</sup>      | 3.67 <sup>h</sup> | 3.38 <sup>h</sup> | 3.39 <sup>d</sup> | 2.25 <sup>d</sup> | 0.25 <sup>d</sup> | 4.61 <sup>h</sup>         |
| Maintaining biodiversity (R4)                   | 2.34 <sup>d</sup> | 1.95 <sup>h</sup> | 1.72 <sup>h</sup> | 2.13 <sup>h</sup>    | 3.41 <sup>h</sup>      | 3.03 <sup>h</sup> | 2.72 <sup>h</sup> | 3.01 <sup>d</sup> | 2.00 <sup>d</sup> | 0.22 <sup>d</sup> | 4.26 <sup>h</sup>         |
| Providing habitats for pollinating insects (R5) | 2.37 <sup>d</sup> | 1.40 <sup>h</sup> | 1.40 <sup>h</sup> | 2.47 <sup>h</sup>    | 3.64 <sup>h</sup>      | 2.99 <sup>h</sup> | 3.21 <sup>h</sup> | 3.06 <sup>d</sup> | 2.03              | 0.23 <sup>d</sup> | 4.20 <sup>h</sup>         |
| Pest control (R6)                               | 2.47 <sup>d</sup> | 1.88 <sup>h</sup> | 2.72 <sup>h</sup> | 2.78 <sup>h</sup>    | 3.12 <sup>h</sup>      | 3.21 <sup>h</sup> | 2.62 <sup>h</sup> | 3.19 <sup>d</sup> | 2.11 <sup>d</sup> | 0.24 <sup>d</sup> | 3.72 <sup>h</sup>         |
| Disease control (R7)                            | 2.64 <sup>d</sup> | 2.42 <sup>h</sup> | 2.77 <sup>h</sup> | 3.11 <sup>h</sup>    | 3.24 <sup>h</sup>      | 3.26 <sup>h</sup> | 2.92 <sup>h</sup> | 3.41 <sup>d</sup> | 2.26 <sup>d</sup> | 0.25 <sup>d</sup> | 4.01 <sup>h</sup>         |
| Maintenance or increase of soil fertility (R8)  | 0.00 <sup>a</sup> | 1.98 <sup>h</sup> | 2.29 <sup>h</sup> | 2.77 <sup>h</sup>    | 2.37 <sup>h</sup>      | 2.48 <sup>h</sup> | 2.57 <sup>h</sup> | 1.98 <sup>i</sup> | 2.47 <sup>i</sup> | 3.46 <sup>i</sup> | 3.64 <sup>h</sup>         |
| Positive effect on the climate (R9)             | 1.30 <sup>e</sup> | 1.29 <sup>h</sup> | 2.37 <sup>h</sup> | 2.11 <sup>h</sup>    | 2.28 <sup>h</sup>      | 4.11 <sup>h</sup> | 2.69 <sup>h</sup> | 5.00 <sup>e</sup> | 1.08 <sup>e</sup> | 1.08 <sup>e</sup> | 4.38 <sup>h</sup>         |
| Opportunities for leisure activities (C1)       | 2.64 <sup>f</sup> | 2.83 <sup>h</sup> | 2.41 <sup>h</sup> | 3.58 <sup>h</sup>    | 4.55 <sup>h</sup>      | 3.60 <sup>h</sup> | 3.56 <sup>h</sup> | 2.43 <sup>f</sup> | 3.49 <sup>f</sup> | 3.79 <sup>f</sup> | 4.59 <sup>h</sup>         |
| Attractive housing and living space (C2)        | 1.76 <sup>a</sup> | 2.30 <sup>h</sup> | 1.35 <sup>h</sup> | 2.56 <sup>h</sup>    | 2.61 <sup>h</sup>      | 1.91 <sup>h</sup> | 2.16 <sup>h</sup> | 1.67 <sup>a</sup> | 2.14 <sup>a</sup> | 2.27 <sup>a</sup> | 3.04 <sup>h</sup>         |
| Experience of animals & plants (C3)             | 0.79 <sup>f</sup> | 1.65 <sup>h</sup> | 1.54 <sup>h</sup> | 2.15 <sup>h</sup>    | 3.21 <sup>h</sup>      | 3.26 <sup>h</sup> | 3.16 <sup>h</sup> | 2.47 <sup>f</sup> | 3.72 <sup>f</sup> | 3.68 <sup>f</sup> | 4.46 <sup>h</sup>         |
| Aesthetic inspiration (C4)                      | 2.56 <sup>f</sup> | 3.06 <sup>h</sup> | 2.45 <sup>h</sup> | 3.30 <sup>h</sup>    | 3.82 <sup>h</sup>      | 3.63 <sup>h</sup> | 3.55 <sup>h</sup> | 2.99 <sup>f</sup> | 4.31 <sup>f</sup> | 4.66 <sup>f</sup> | 4.35 <sup>h</sup>         |
| Cultural heritage (C5)                          | 3.86 <sup>f</sup> | 2.82 <sup>h</sup> | 2.83 <sup>h</sup> | 3.16 <sup>h</sup>    | 3.59 <sup>h</sup>      | 3.24 <sup>h</sup> | 3.75 <sup>h</sup> | 1.59 <sup>f</sup> | 2.43 <sup>f</sup> | 2.34 <sup>f</sup> | 4.25 <sup>h</sup>         |
| Provisioning ES                                 | 0.06 <sup>g</sup> | 0.84 <sup>g</sup> | 1.57 <sup>g</sup> | 1.38 <sup>g</sup>    | 1.56 <sup>g</sup>      | 2.71 <sup>g</sup> | 1.78 <sup>g</sup> | 1.63 <sup>g</sup> | 1.14 <sup>g</sup> | 0.81 <sup>g</sup> |                           |
| Regulating ES                                   | 1.87 <sup>g</sup> | 1.71 <sup>g</sup> | 2.04 <sup>g</sup> | 2.49 <sup>g</sup>    | 2.99 <sup>g</sup>      | 3.05 <sup>g</sup> | 2.78 <sup>g</sup> | 2.79 <sup>g</sup> | 2.29 <sup>g</sup> | 1.40 <sup>g</sup> |                           |
| Cultural ES                                     | 2.32 <sup>g</sup> | 2.53 <sup>g</sup> | 2.12 <sup>g</sup> | 2.95 <sup>g</sup>    | 3.56 <sup>g</sup>      | 3.13 <sup>g</sup> | 3.24 <sup>g</sup> | 2.23 <sup>g</sup> | 3.22 <sup>g</sup> | 3.35 <sup>g</sup> |                           |

Sources: <sup>a</sup> own assessment; <sup>b</sup> inverse of Nitrogen export [4]; <sup>c</sup> inverse of quick flow [4]; <sup>d</sup> calculated via plant diversity [5]; <sup>e</sup> Carbon sequestration of open grassland, [4]; <sup>f</sup> derived after [6]; <sup>g</sup> own calculation (mean of all ES within ES category); <sup>h</sup> [7]; <sup>i</sup> derived from Table 3.1 in [8].

## References

1. Tappeiner, U.; Borsdorf, A.; Tasser, E.I. Alpenatlas: society, economy, environment = Atlas des Alpes = Atlante delle Alpi = Atlas Alp = Mapping the Alps 2008, IX, 278 S. : Ill., graph. Darst., zahlr. Kt.
2. European Environment Agency Corine Land Cover (CLC) 2018, Version 2020\_20u1 Available online: <https://land.copernicus.eu/pan-european/corine-land-cover/clc2018> (accessed on Apr 26, 2021).
3. Schirpke, U.; Tasser, E. Trends in Ecosystem Services across Europe Due to Land-Use/Cover Changes. *Sustain.* 2021, 13.
4. Bagstad, K.J.; Ingram, J.C.; Lange, G.-M.; Masozera, M.; Ancona, Z.H.; Bana, M.; Kagabo, D.; Musana, B.; Nabahungu, N.L.; Rukundo, E.; et al. Towards ecosystem accounts for Rwanda: Tracking 25 years of change in flows and potential supply of ecosystem services. *People Nat.* **2020**, 2, 163–188, doi:<https://doi.org/10.1002/pan3.10062>.
5. Tasser, E.; Sternbach, E.; Tappeiner, U. Biodiversity indicators for sustainability monitoring at municipality level: An example of implementation in an alpine region. *Ecol. Indic.* **2008**, 8, 204–223, doi:<https://doi.org/10.1016/j.ecolind.2007.01.005>.
6. Zoderer, B.M.; Tasser, E.; Carver, S.; Tappeiner, U. An integrated method for the mapping of landscape preferences at the regional scale. *Ecol. Indic.* **2019**, 106, 105430, doi:[10.1016/j.ecolind.2019.05.061](https://doi.org/10.1016/j.ecolind.2019.05.061).
7. Tasser, E.; Schirpke, U.; Zoderer, B.M.; Tappeiner, U. Towards an integrative assessment of land-use type values from the perspective of ecosystem services. *Ecosyst. Serv.* **2020**, 42, 101082, doi:[10.1016/j.ECOSER.2020.101082](https://doi.org/10.1016/j.ECOSER.2020.101082).
8. Millennium Ecosystem Assessment *ECOSYSTEMS AND HUMAN WELL-BEING: WETLANDS AND WATER Synthesis.*; Washington, DC, 2005;
